# Supplementary material
Source: publisher figshare collection journal article supplement (https://acs.figshare.com/ndownloader/files/32401700)

## **Supporting Information for the Paper “A Phage Display-Derived Peptide for the Specific Binding of SARS-CoV-2”**

Fan Yang<sup>1\*</sup>, Li Liu<sup>2,3\*</sup>, Pierre Fernand Neuenschwander<sup>4</sup>, Steven Idell<sup>4</sup>, Ramakrishna Vankayalapati<sup>1</sup>, Krishan Gopal Jain<sup>4</sup>, Ke Du<sup>2,3</sup>, Honglong Ji<sup>4</sup>, Guohua Yi<sup>1#</sup>

1. Department of Pulmonary Immunology, The University of Texas Health Science Center at Tyler, Tyler, Texas, United States.
2. Department of Microsystems Engineering, Rochester Institute of Technology, Rochester, New York, United States
3. Department of Mechanical Engineering, Rochester Institute of Technology, Rochester, New York, United States
4. Department of Cellular and Molecular Biology, The University of Texas Health Science Center at Tyler, Tyler, Texas, United States.

\*Contribute equally.

#Corresponding author.

Email address: [guohua.yi@uthct.edu](mailto:guohua.yi@uthct.edu)

## Figure S1: Mass spectrometric characterization of peptides

Figure S1a-f respectively presents the mass spectra data of peptide 1-6.

Figure S1a.

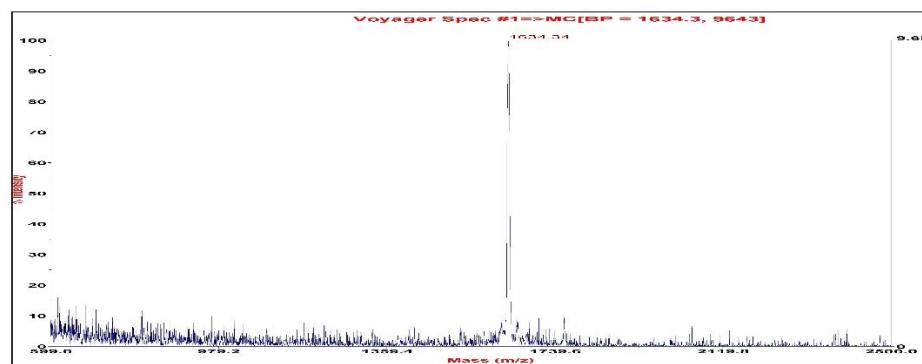

Fig S1b.

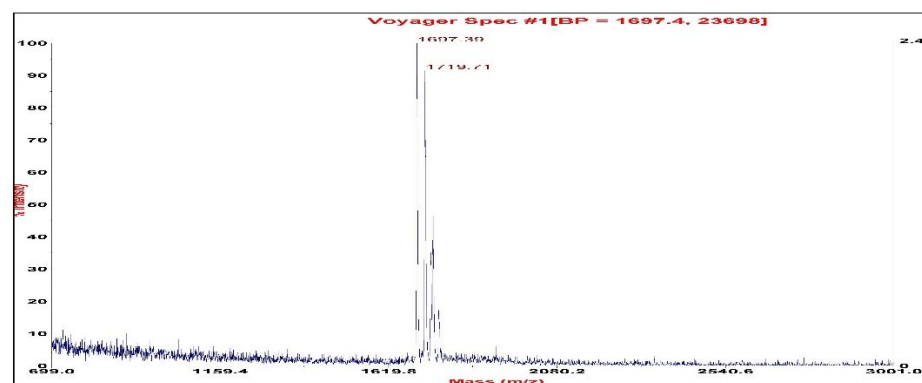

Fig S1c.

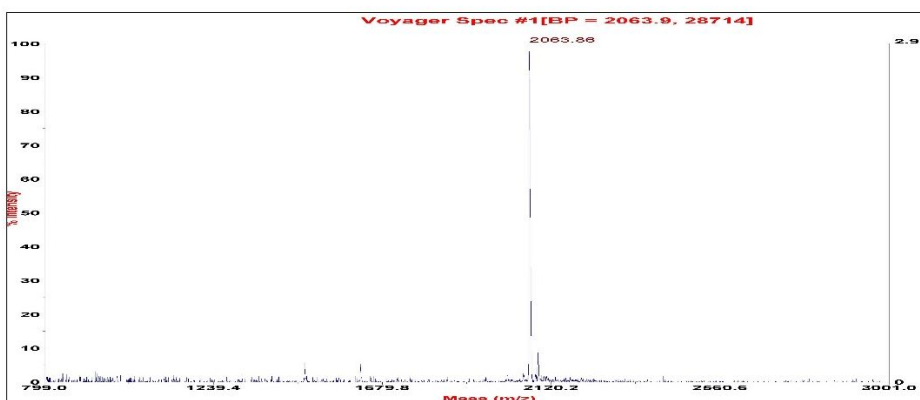

Fig S1d.

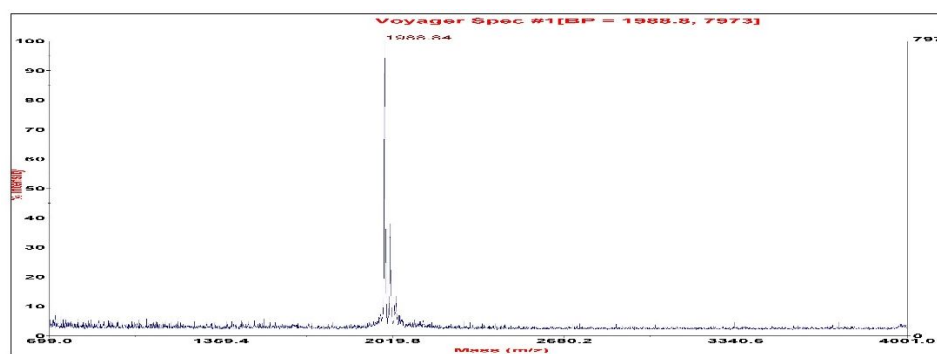

Fig S1e

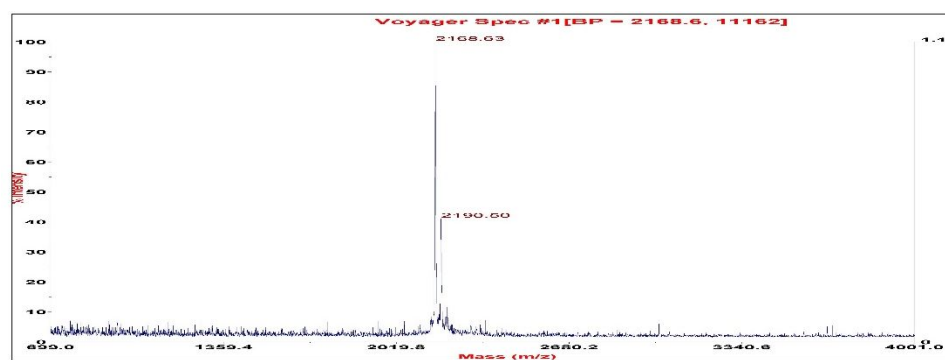

Fig S1f.

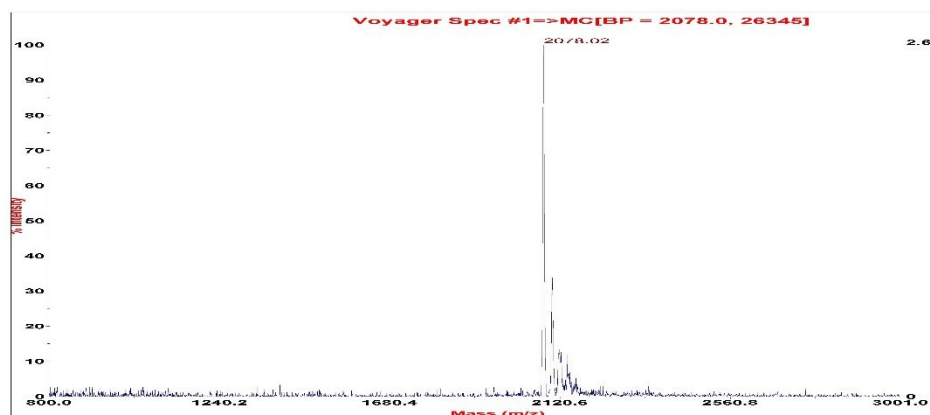

## Figure S2: Binding curve of SARS-CoV-2 RBD to peptide 1

SARS-CoV-2 RBD was loaded on the Biacore Sensor Chip NTA via His-tag expressed at N-terminus of RBD protein. The synthesized peptide 1 was running through the chip, and the binding curves were recorded.

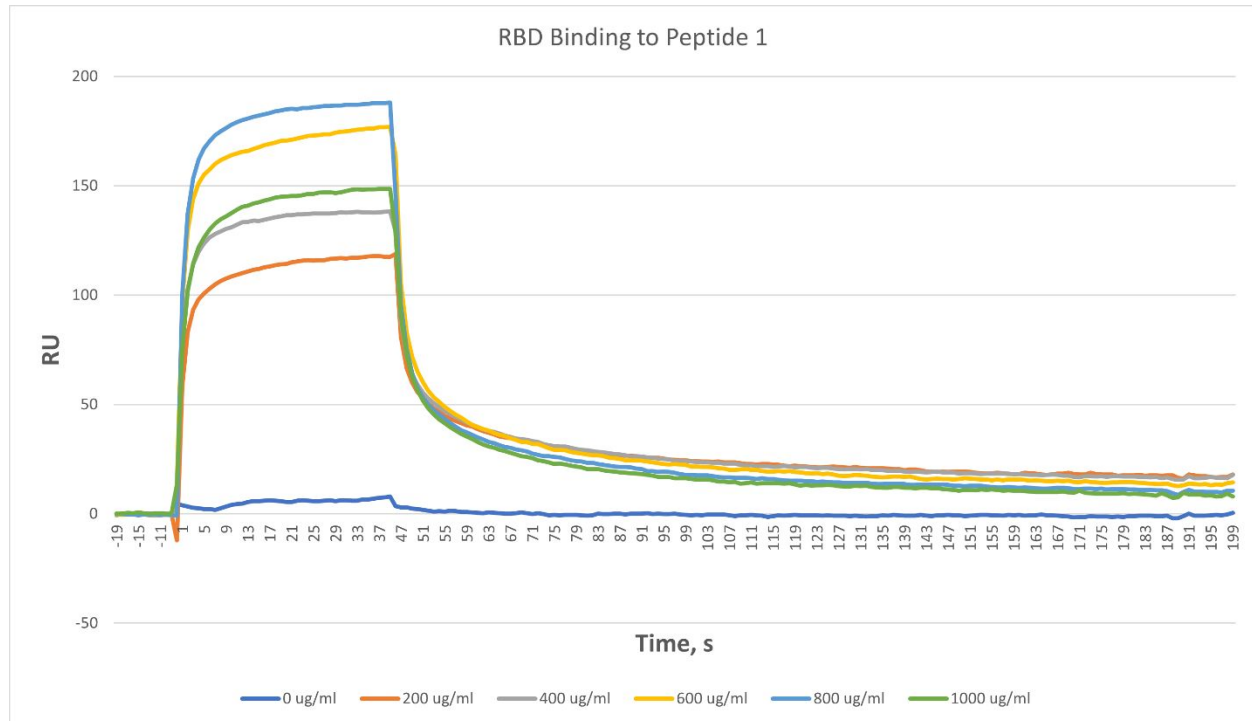

**Figure S3: SARS-CoV-2 specific gold nanoparticle counts under TEM**

Au-NP labeled SARS-CoV-2 spike specific antibody bound virus particles were counted under TEM, four fields were counted for each sample.

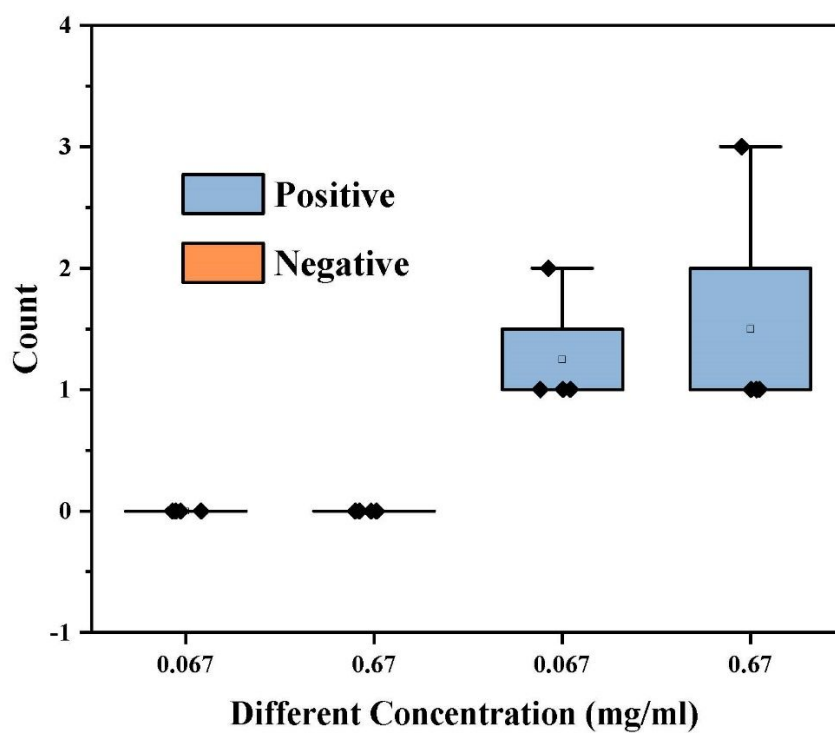

#### Figure S4: Peptide-SARS-CoV-2 beads assay

(**Figure S4a**) Scheme of the peptide sandwich assay. Magnetic beads (10  $\mu$ L at 10 mg/mL) were conjugated with Biotinylated peptide 1 (10  $\mu$ L at 2 mg/mL), and incubated at 30 min. After washing with PBS-T for three times, 10  $\mu$ L inactivated SARS-CoV-2 virus ( $1.6 \times 10^5$  TCID<sub>50</sub> per mL) or Influenza virus ( $1.6 \times 10^5$  CEID<sub>50</sub> per mL) was applied and incubated for 20 min. After washing away the free and non-specific bound viruses by PBS-T, the magnetic beads were blocked with 5% BSA, and AuNP-labeled antibodies were used to bind the virus, and the virus-bound beads were heated to release the Au-Antibody bound viruses. (**Figure S4b**) Tubes showing the heat-released Au-Ab bound SARS-CoV-2 (left) or influenza virus (right).

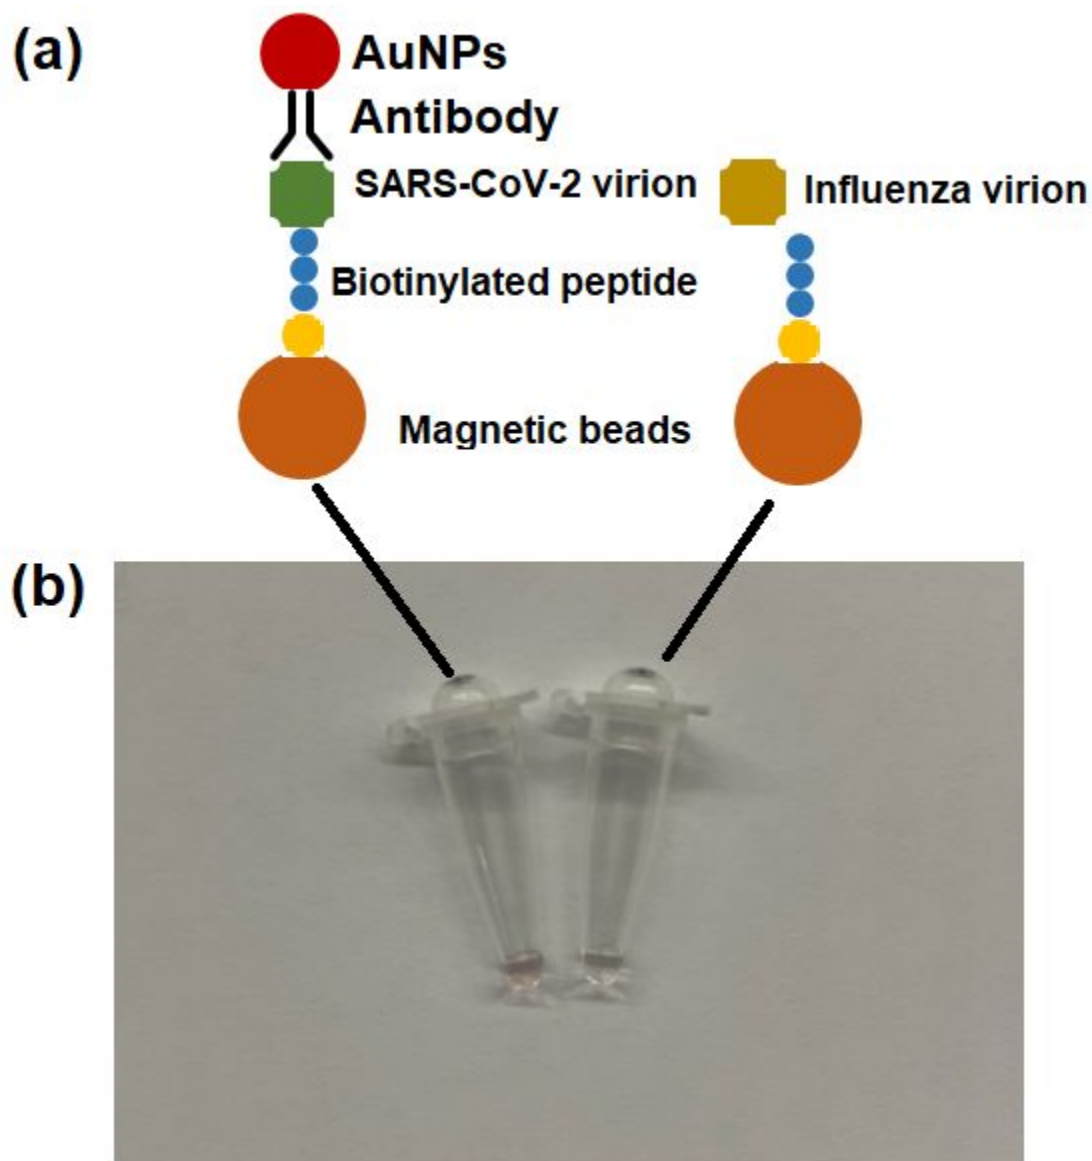

Supplement: Supplementary file 1 [file 32401700]
